# Supplementary material for: Genome-Wide Localization of Protein-DNA Binding and Histone Modification by a Bayesian Change-Point Method with ChIP-seq Data
Source: PLoS Comput Biol. 2012 Jul 26;8(7):e1002613. doi: 10.1371/journal.pcbi.1002613 (PMC3406014; doi:10.1371/journal.pcbi.1002613)
Supplement: Text S1 — Supporting materials for BCP. (PDF) [file pcbi.1002613.s001.pdf]

# Supporting Information File (Text S1)

Haipeng Xing, Yifan Mo, Will Liao, Michael Q. Zhang

## Bounded Complexity Mixture (BCMIX) Approximation

Although the weight (2) in manuscript uses a recursive updating procedure, the number of weights increases with  $t$ , resulting in unbounded computational complexity and memory requirements in estimating  $\theta_t$  as  $t$  keeps increasing. To reduce the computational complexity, we use the BCMIX approximation proposed by Lai and Xing (2011), which use  $M(p)$  components and the most recent  $m(p)$  weights  $p_{j,n}$  (with  $n - m(p) < j \leq n$  and  $m(p) < M(p)$ ) for the posterior density (1) in manuscript. In particular, let  $\mathcal{K}_{t-1}(p)$  be the set of indices  $i$  for which  $p_{i,t-1}$  is kept at stage  $t-1$ ; thus,  $\mathcal{K}_{t-1}(p) \supset \{t-1, \dots, t-m(p)\}$ . At stage  $t$ , define  $p_{i,t}^*$  as in (2) in manuscript for  $i \in \{t\} \cup \mathcal{K}_{t-1}(p)$ , and let  $i_t$  be the index not belonging to  $\{t, \dots, t-m(p)+1\}$  such that

$$p_{i_t,t}^* = \min\{p_{j,t}^* : j \in \mathcal{K}_{t-1}(p) \text{ and } j \leq t-m(p)\},$$

choosing  $i_t$  to be the minimizer farthest from  $t$  if the above set has two or more minimizers. Define  $\mathcal{K}_t(p) = \{t\} \cup (\mathcal{K}_{t-1}(p) - \{i_t\})$ , and let

$$p_{i,t} = \left( p_{i,t}^* / \sum_{j \in \mathcal{K}_t(p)} p_{j,t}^* \right), \quad i \in \mathcal{K}_t(p).$$

Similarly, to obtain a BCMIX approximation to (3) in manuscript, let  $\tilde{\mathcal{K}}_{t+1}(p)$  denote the set of indices  $j$  for which  $q_{j,t+1}$  in (4) in manuscript is kept at stage  $t+1$ ; thus,  $\tilde{\mathcal{K}}_{t+1}(p) \supset \{t+1, \dots, t+m(p)\}$ . At stage  $t$ , define  $q_{j,t}^*$  as in (4) in manuscript for  $j \in \{t\} \cup \tilde{\mathcal{K}}_{t+1}(p)$ , and let  $j_t$  be the index not belonging to  $\{t, \dots, t+m(p)-1\}$  such that

$$q_{j_t,t}^* = \min\{q_{j,t}^* : j \in \tilde{\mathcal{K}}_{t+1}(p) \text{ and } j \geq t+m(p)\},$$

choosing  $j_t$  to be the minimizer farthest from  $t$  if the above set has two or more minimizers. Define  $\tilde{\mathcal{K}}_t(p) = \{t\} \cup (\tilde{\mathcal{K}}_{t+1}(p) - \{j_t\})$  and let  $q_{j,t} = \left( q_{j,t}^* / \sum_{j \in \tilde{\mathcal{K}}_t(p)} q_{j,t}^* \right)$ ,  $j \in \tilde{\mathcal{K}}_t(p)$ , which yields a BCMIX approximation to the density  $f(\theta_t | \mathcal{Y}_{t+1,n})$ .

The BCMIX approximation to the smoother can be obtained by combining the forward and backward BCMIX filters via Bayes' theorem:

$$f(\theta_t | \mathcal{Y}_n) \approx \sum_{i \in \mathcal{K}_t(p), j \in \tilde{\mathcal{K}}_{t+1}(p)} \gamma_{ijt} \pi(\theta_t; a_0 + j - i + 1, \bar{\mathbf{Y}}_{i,j}),$$

in which  $\gamma_{ijt} = \gamma_{ijt}^* / \tilde{P}_t$ ,  $\tilde{P}_t = p + \sum_{1 \leq t \leq n, i \in \mathcal{K}_t(p), j \in \tilde{\mathcal{K}}_{t+1}(p)} \gamma_{ijt}^*$ , and  $\beta_{ijt}^*$  given by (??) for  $i \in \mathcal{K}_t(p)$  and  $j \in \tilde{\mathcal{K}}_{t+1}(p)$ . The BCMIX approximation to  $E(\theta_t | \mathcal{Y}_n)$  is therefore

$$\hat{\theta}_t = \sum_{i \in \mathcal{K}_t(p), j \in \tilde{\mathcal{K}}_{t+1}(p)} \gamma_{ijt} \alpha_{ij} \beta_{ij}.$$

The BCMIX approximation is accurate as it converges to the true  $\theta_t$  when the sample size become larger; see the discussion on the efficiency and convergence of the BCMIX approximation in Lai and Xing (2011). Note that the BCMIX approximation  $\hat{\theta}_t$  reduce the computational complexity of estimating  $\{\theta_t\}_{1 \leq t \leq n}$  from  $O(n^3)$  to  $O(n)$ , which greatly reduces computational time and memory requirement in practice and are much faster than other methods in the literature.

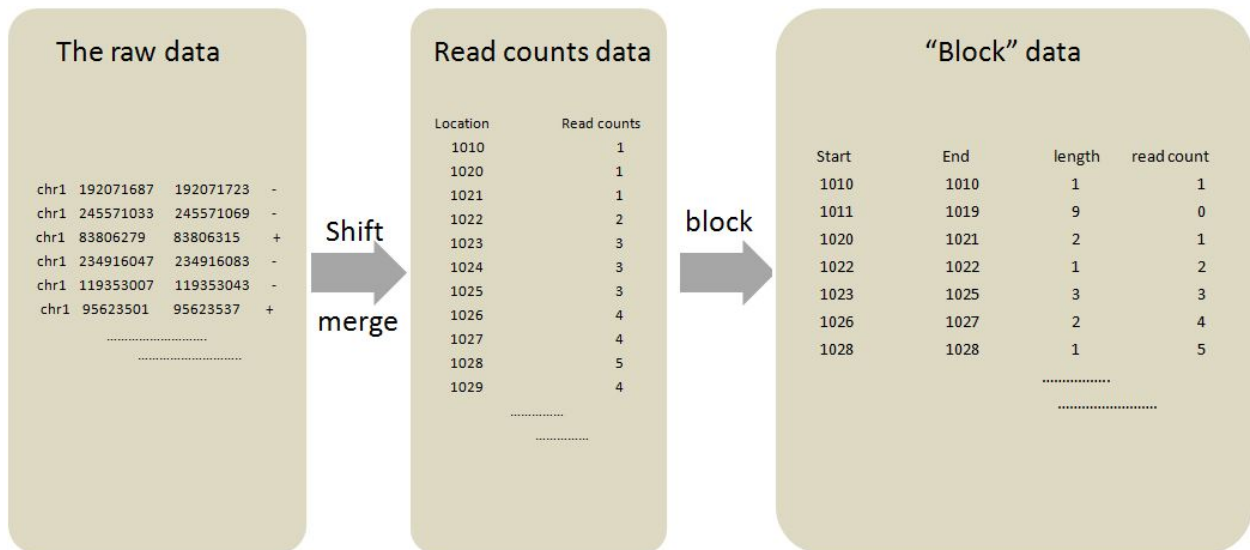

**Figure S1.** Pre-processing data for transcription factor case

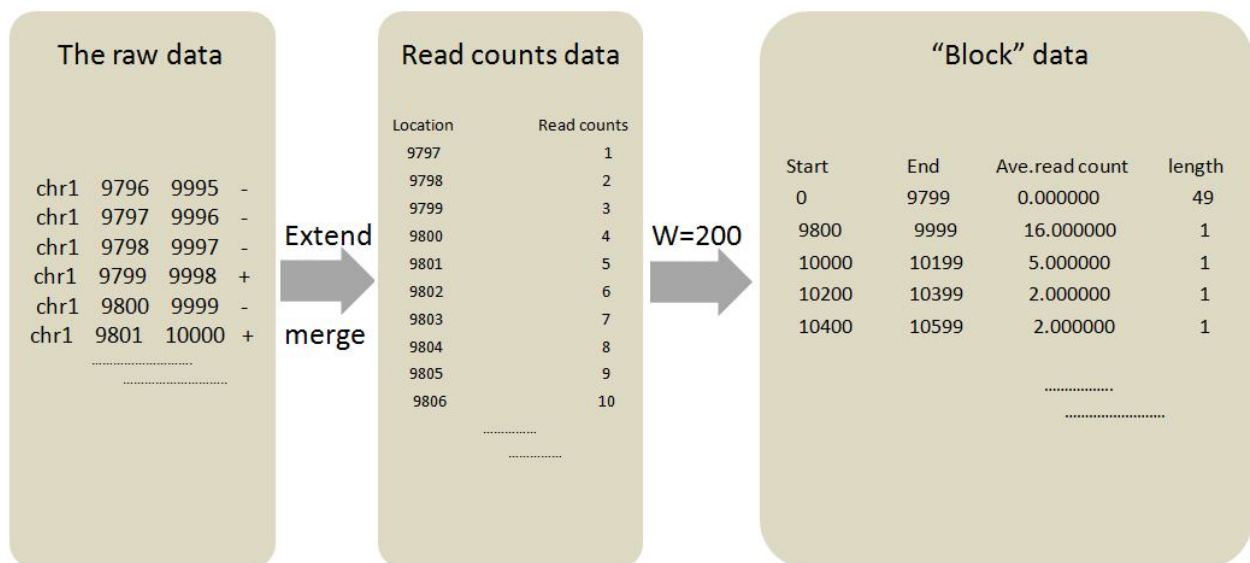

**Figure S2.** Pre-processing data for histone modification case with window size 200bp.

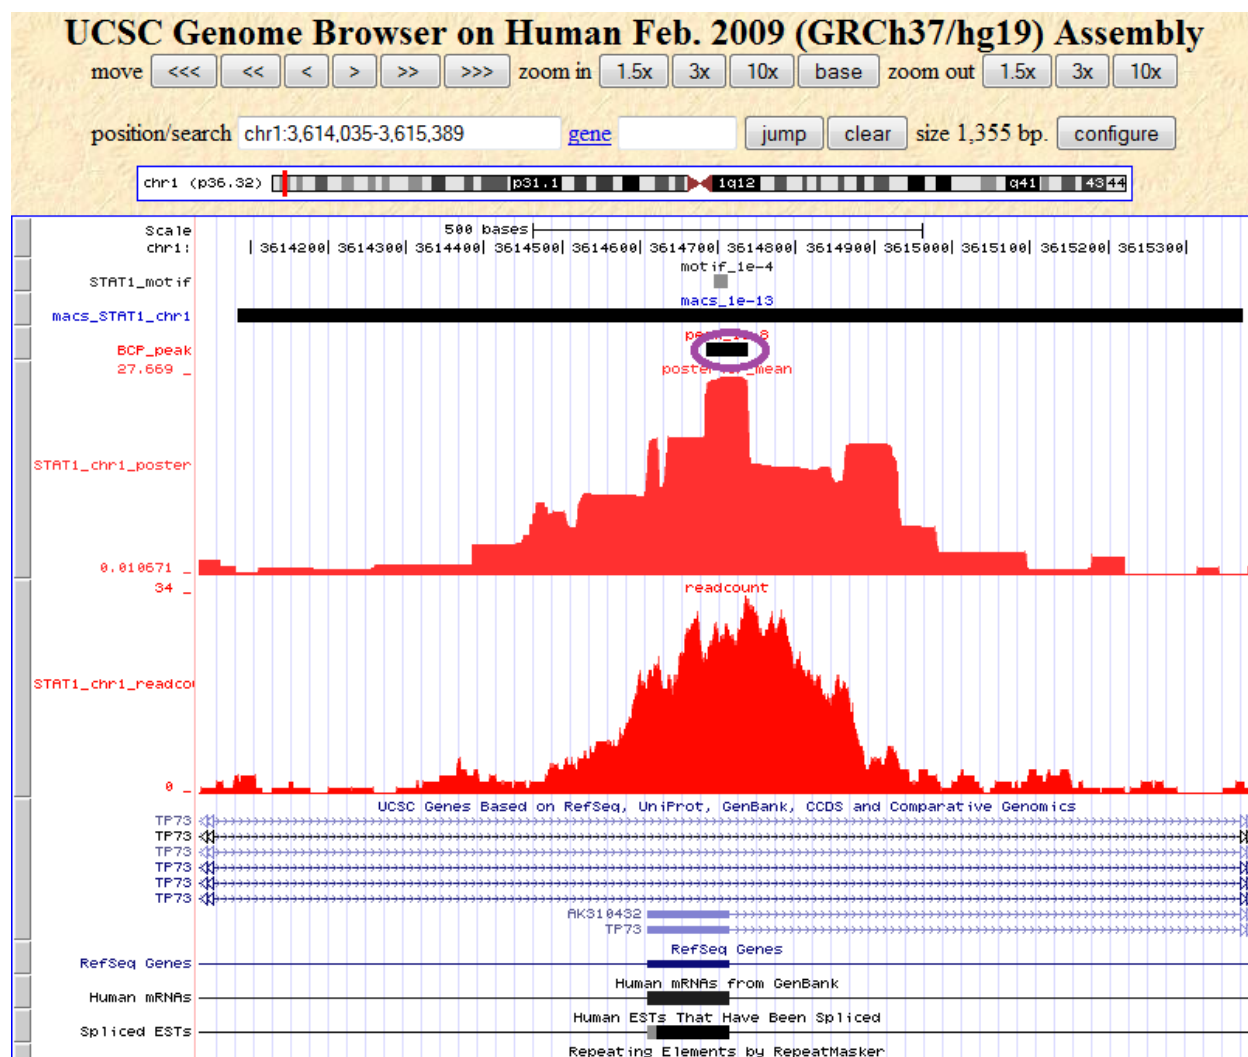

**Figure S3.** Choosing the most enrichment area as the candidate peak for TFBS indicated by the purple circle.

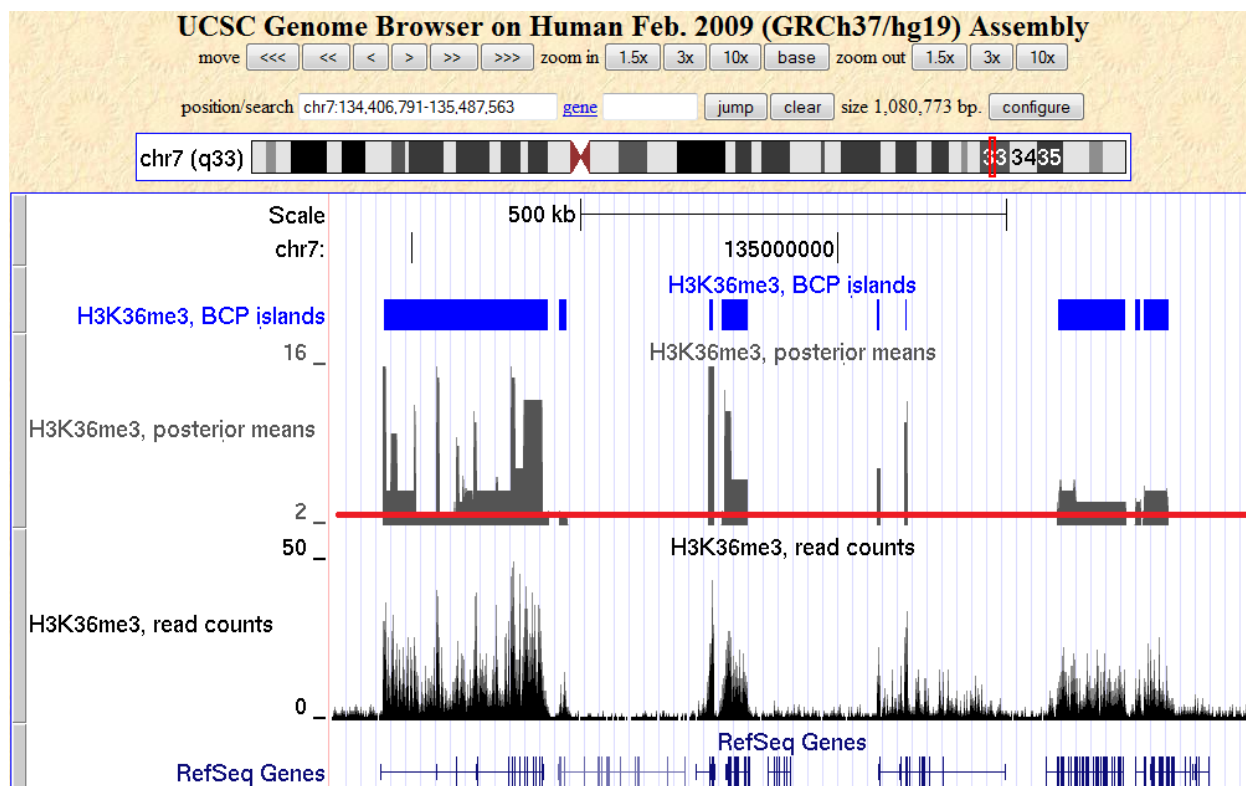

**Figure S4.** Choosing the candidate segments for HM. The red line is the threshold, regions beyond the red line will generate candidate segments.

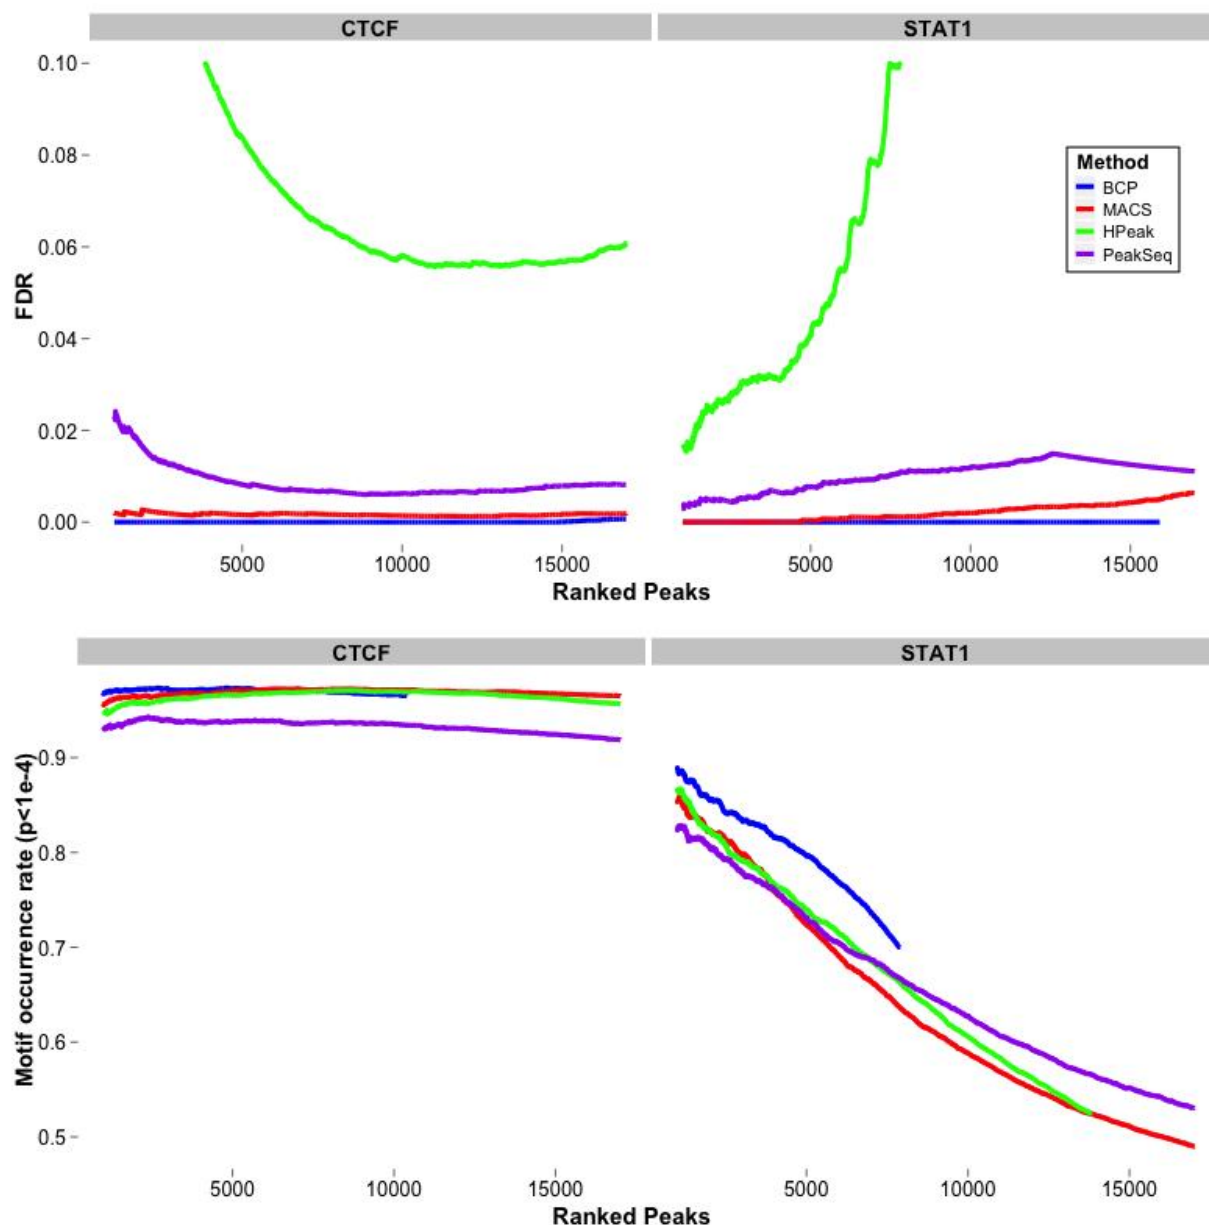

**Figure S5.** Along with diffuse histone data, BCP showed strong performance in punctate transcription factor ChIP-seq data. Comparing to MACS, HPeak, and PeakSeq, peak-calling algorithms designed with punctate peaks in mind, BCP shows a comparable or improved false-discovery rate (FDR) and rate of motif occurrence within called peaks. Peaks are ranked according to p-value.

**Table S1. Island coverage** (the fraction of aligned reads falling within islands of enrichment) was used to neutralize parameter-dependent fluctuation so BCP, MACS and SICER could be compared fairly. MACS displayed very low island coverage across all p value thresholds suggesting poor performance, as expected. BCP “threshold” generically describes thresholds used to identify regions of enrichment from background based on posterior means—ranging from the 50th to the 90th-quantile read count value based on the a Poisson distribution with mean determined from the whole data set. BCP Islands were routinely larger than MACS as well as SICER—even at similar island coverage in both H3K27me3 and H3K36me3 data sets. Given MACS was not designed for identifying broad regions of enrichment, it was not surprising to see it did not perform well in this test.

|       | parameters   | H3K27me3              |                 |                 | H3K36me3              |                 |                 |
|-------|--------------|-----------------------|-----------------|-----------------|-----------------------|-----------------|-----------------|
|       |              | Avg. island size (kb) | Genome coverage | Island coverage | Avg. island size (kb) | Genome coverage | Island coverage |
| BCP   | threshold 1  | 49.2                  | 0.210           | 0.680           | 54.8                  | 0.170           | 0.720           |
|       | threshold 2  | 41.8                  | 0.190           | 0.680           | 48.0                  | 0.160           | 0.710           |
|       | threshold 3  | 32.9                  | 0.170           | 0.630           | 35.9                  | 0.140           | 0.690           |
|       | threshold 4  | 26.8                  | 0.140           | 0.600           | 28.5                  | 0.120           | 0.660           |
|       | threshold 5  | 22.9                  | 0.120           | 0.560           | 23.9                  | 0.110           | 0.630           |
| MACS  | $p < 1e - 1$ | 1.7                   | 0.132           | 0.130           | 2.4                   | 0.107           | 0.106           |
|       | $p < 1e - 2$ | 1.9                   | 0.097           | 0.096           | 2.5                   | 0.086           | 0.085           |
|       | $p < 1e - 4$ | 2.1                   | 0.063           | 0.063           | 2.6                   | 0.067           | 0.066           |
|       | $p < 1e - 6$ | 2.2                   | 0.046           | 0.046           | 2.4                   | 0.054           | 0.053           |
| SICER | W200-G200    | 2.5                   | 0.080           | 0.520           | 2.0                   | 0.060           | 0.540           |
|       | W200-G400    | 4.2                   | 0.100           | 0.550           | 3.2                   | 0.070           | 0.570           |
|       | W200-G800    | 6.0                   | 0.090           | 0.520           | 8.7                   | 0.110           | 0.660           |
|       | W400-G400    | 4.7                   | 0.103           | 0.566           | 6.8                   | 0.070           | 0.651           |
|       | W400-G800    | 7.5                   | 0.119           | 0.590           | 10.7                  | 0.110           | 0.667           |
|       | W400-G1200   | 10.4                  | 0.131           | 0.608           | 14.8                  | 0.060           | 0.678           |

**Table S2. Overlaps Ratio** Here we give more parameter settings and corresponding association of Table 1. Additionally, BCP has a p-value threshold for calling significant islands—modeling the number of ChIP reads within a segment on a Poisson distribution with a mean derived from control data set. Scaling this parameter does not substantially affect island detection in relation to varying width and gap parameters in SICER. MACS did not perform well as was excluded from the remainder of the diffuse island analysis.

|       | Parameters | Average island size<br>(kb) | Island coverage | Fraction of gene<br>covered by island | Island covered by<br>intergenic | Island covered by<br>H3K27me3 | Rep. 1 covered<br>by rep. 2 | Rep. 2 covered<br>by rep. 1 |
|-------|------------|-----------------------------|-----------------|---------------------------------------|---------------------------------|-------------------------------|-----------------------------|-----------------------------|
| BCP   | $p < 1e-5$ | 25.8                        | 0.629           | 0.497                                 | 0.089                           | 0.019                         | 0.851                       | 0.805                       |
|       | $p < 5e-5$ | 25.5                        | 0.630           | 0.496                                 | 0.089                           | 0.019                         | 0.852                       | 0.804                       |
|       | $p < 1e-4$ | 25.3                        | 0.630           | 0.496                                 | 0.089                           | 0.019                         | 0.852                       | 0.804                       |
|       | $p < 5e-4$ | 24.9                        | 0.631           | 0.494                                 | 0.090                           | 0.020                         | 0.852                       | 0.803                       |
|       | $p < 1e-3$ | 24.7                        | 0.631           | 0.494                                 | 0.090                           | 0.020                         | 0.852                       | 0.803                       |
|       | $p < 5e-3$ | 24.1                        | 0.632           | 0.493                                 | 0.090                           | 0.020                         | 0.853                       | 0.803                       |
|       | $p < 1e-2$ | 23.9                        | 0.632           | 0.492                                 | 0.090                           | 0.021                         | 0.853                       | 0.802                       |
|       | $p < 5e-2$ | 23.3                        | 0.633           | 0.492                                 | 0.091                           | 0.022                         | 0.852                       | 0.801                       |
|       | $p < 1e-1$ | 23.1                        | 0.634           | 0.491                                 | 0.091                           | 0.022                         | 0.852                       | 0.800                       |
| MACS  | $p < 1e-1$ | 2.4                         | 0.130           | 0.337                                 | 0.908                           | 0.025                         | 0.726                       | 0.713                       |
|       | $p < 1e-2$ | 2.5                         | 0.096           | 0.329                                 | 0.923                           | 0.011                         | 0.787                       | 0.696                       |
|       | $p < 1e-4$ | 2.6                         | 0.063           | 0.285                                 | 0.932                           | 0.005                         | 0.834                       | 0.618                       |
|       | $p < 1e-6$ | 2.4                         | 0.046           | 0.246                                 | 0.935                           | 0.002                         | 0.848                       | 0.571                       |
| SICER | W200-G200  | 2.7                         | 0.616           | 0.323                                 | 0.085                           | 0.021                         | 0.689                       | 0.805                       |
|       | W200-G400  | 4.5                         | 0.636           | 0.370                                 | 0.088                           | 0.025                         | 0.736                       | 0.814                       |
|       | W200-G800  | 8.7                         | 0.661           | 0.437                                 | 0.094                           | 0.032                         | 0.800                       | 0.818                       |
|       | W50-G200   | 1.6                         | 0.584           | 0.268                                 | 0.081                           | 0.015                         | 0.522                       | 0.815                       |
|       | W50-G400   | 4.1                         | 0.621           | 0.356                                 | 0.086                           | 0.022                         | 0.606                       | 0.842                       |
|       | W50-G800   | 11.9                        | 0.656           | 0.469                                 | 0.096                           | 0.031                         | 0.716                       | 0.852                       |
|       | W400-G800  | 6.8                         | 0.667           | 0.276                                 | 0.095                           | 0.032                         | 0.796                       | 0.818                       |
|       | W400-G1200 | 10.7                        | 0.678           | 0.295                                 | 0.098                           | 0.036                         | 0.835                       | 0.816                       |
